# Supplementary material for: CD73 and AMPD3 deficiency enhance metabolic performance via erythrocyte ATP that decreases hemoglobin oxygen affinity
Source: PubMed Central journal article supplement (PMC4650700; doi:10.1038/srep13147), 2015-08-07
Supplement: srep13147-s1.pdf [file srep13147-s1.pdf]

Supplementary Figures for

**CD73 and AMPD3 deficiency enhance metabolic performance via erythrocyte ATP that decreases hemoglobin oxygen affinity**

William G O'Brien<sup>1</sup>, III, Vladimir Berka<sup>2</sup>, Ah-Lim Tsai<sup>2</sup>, Zhaoyang Zhao<sup>1</sup> and Cheng Chi Lee<sup>1\*</sup>

<sup>1</sup>Department of Biochemistry and Molecular Biology, University of Texas Health Science Center, Houston, Texas, USA 77030.

<sup>2</sup>Division of Hematology, Department of Internal Medicine, University of Texas Health Science Center, Houston, Texas, USA 77030.

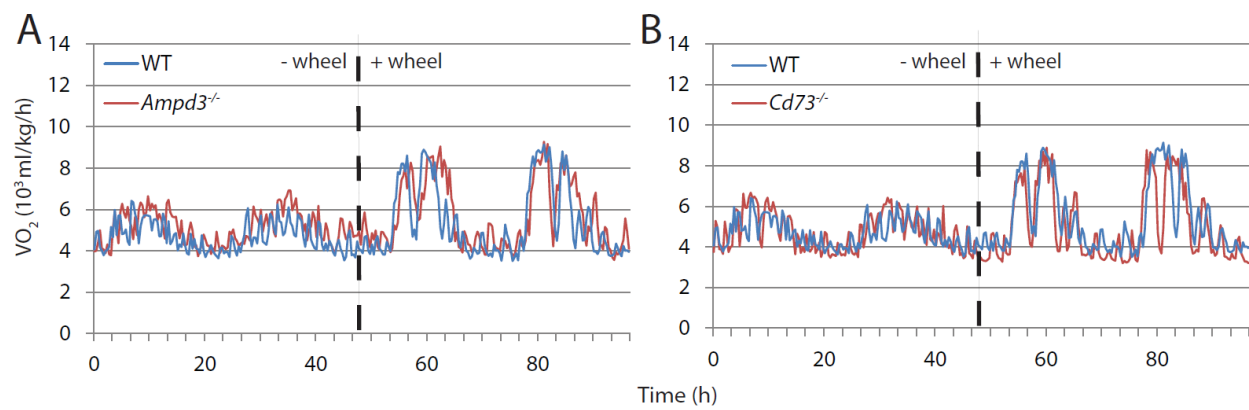

**Figure S1**, Comparing oxygen consumption of WT mice to *Ampd3*<sup>-/-</sup> (A) and *Cd73*<sup>-/-</sup> (B) with and without running wheel over periods of 48 h.

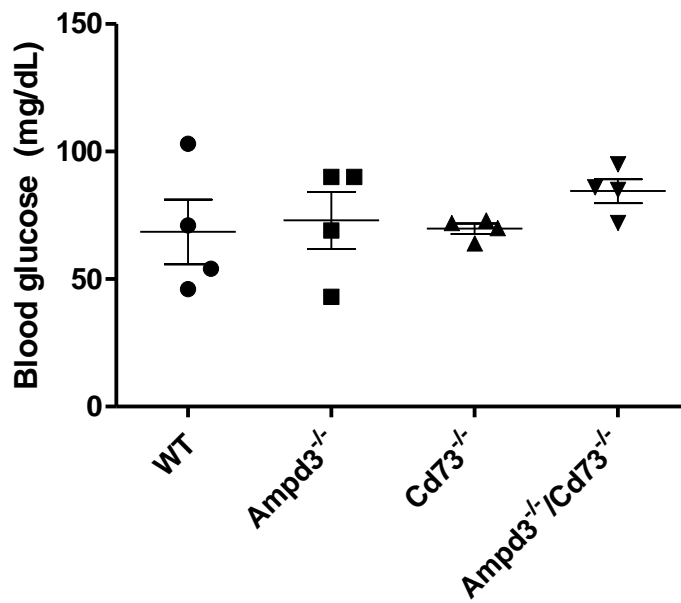

**Figure S2.** Fasting blood glucose levels. Mice from the four genotypes (n=4) were fasted overnight and blood obtained by tail clipping. Blood glucose was measured using a TrueTrack meter (Nipro Diagnostics, FL, USA), following manufacturer's instructions.

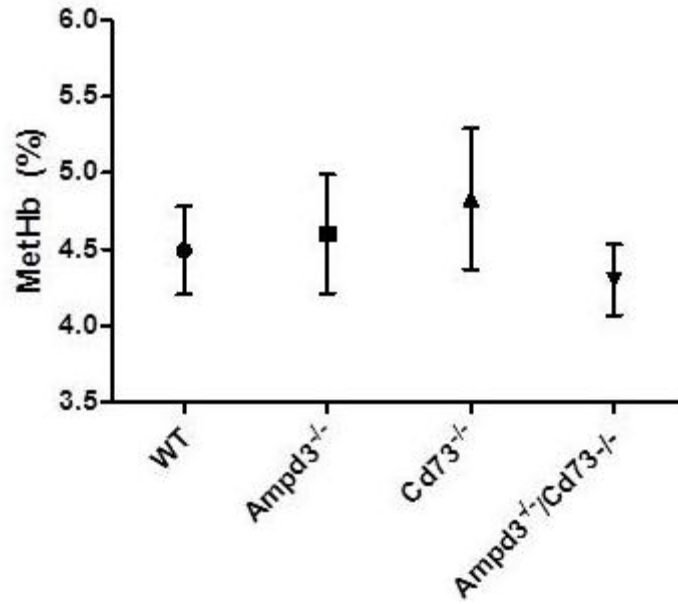

**Figure S3.** Methemoglobin (MetHb) levels in four genotypes, (n=4). The erythrocyte methHb levels are comparable among the four genotypes.

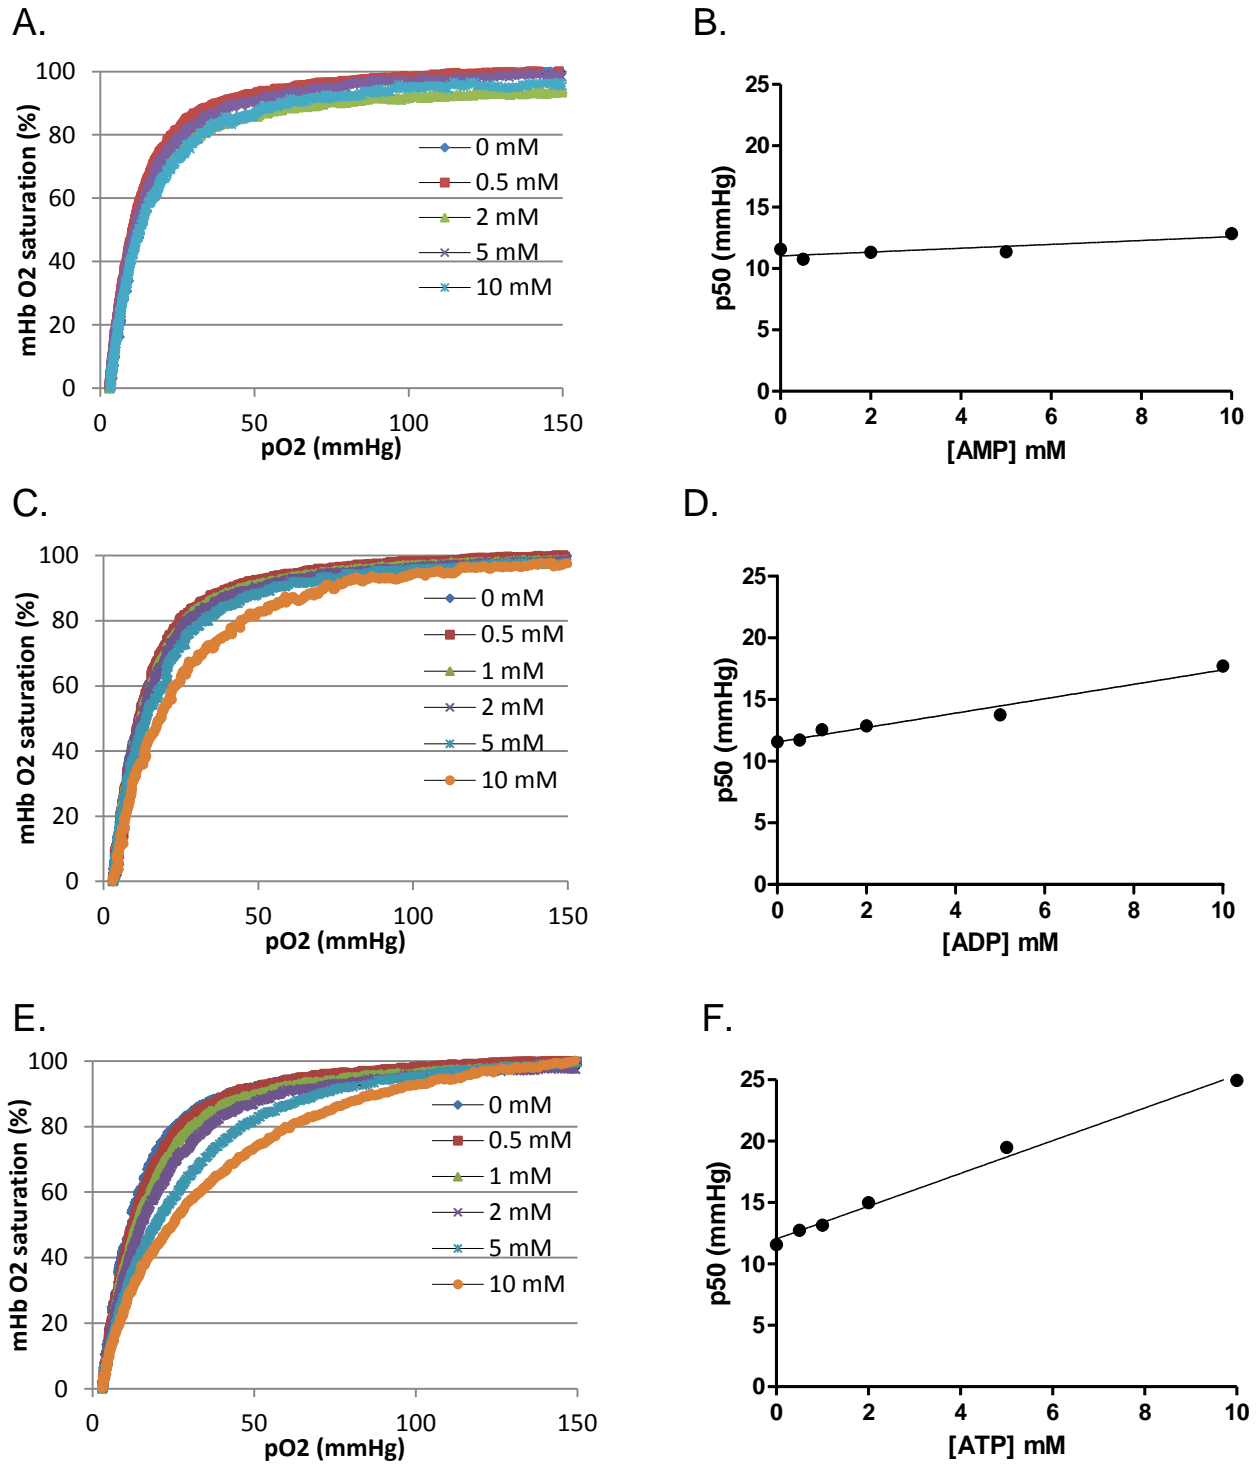

**Figure S4.** Adenine nucleotides' effects on p50 of mouse hemoglobin. Adenine nucleotide titrations of mouse hemoglobin p50: A and B. 5'-AMP ( $m=0.16 \pm 0.05$ ,  $r^2=0.73$ ); C and D. ADP, ( $m=0.58 \pm 0.05$ ,  $r^2=0.97$ ) and E and F. ATP ( $m=1.33 \pm 0.06$ ,  $r^2=0.99$ ).

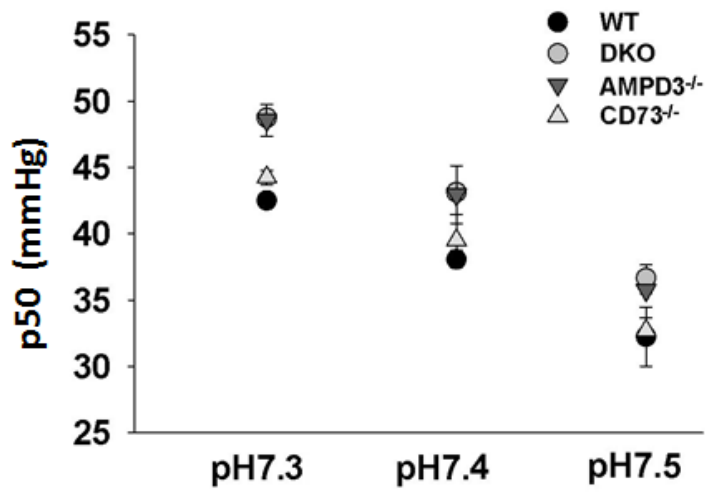

**Figure S5.** Change in Hemox buffer pH and p50 values of mouse erythrocytes of the four genotypes [n=2, DKO (double knockout): *AMPD3*<sup>-/-</sup>/*Cd73*<sup>-/-</sup>].

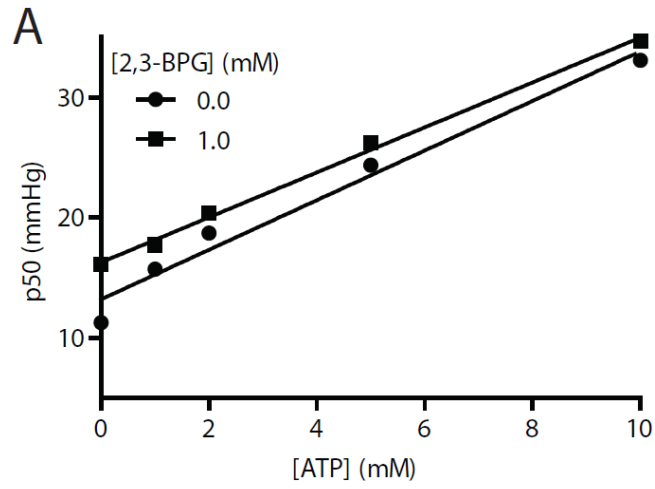

**Figure S6, ATP's efficacy on Hemoglobin p50 is unchanged by addition of 2,3-BPG.**  
ATP titration against human hemoglobin p50 in the presence and absence of 1mM 2,3-BPG.
